# Supplementary material
Source: PubMed Central journal article supplement (PMC5966016)
Supplement: NIHMS966100-supplement-Supplement1.pdf [file NIHMS966100-supplement-Supplement1.pdf]

## Supplementary Appendix

This appendix has been provided by the authors to give readers additional information about their work.

Supplement to: Myers CT, Hollingsworth G, Muir AM, et al. Parental mosaicism in “de novo” epileptic encephalopathies. *N Engl J Med* 2018;378:1646-8. DOI: [10.1056/NEJMc1714579](https://doi.org/10.1056/NEJMc1714579)

**Supplementary Appendix****Table of contents**

|                                                                                                                                        |    |
|----------------------------------------------------------------------------------------------------------------------------------------|----|
| Methods .....                                                                                                                          | 2  |
| Figure S1. Pedigrees of families with confirmed (Family 1-10) or inferred (Family 12, 13) parental mosaicism or a mosaic proband ..... | 4  |
| Table S1. Mosaic probands .....                                                                                                        | 5  |
| Table S2. Families with more than one affected child .....                                                                             | 6  |
| Table S3. Parents with a history of seizures .....                                                                                     | 8  |
| Table S4. Sequencing data, clinical and molecular details for all 120 families .....                                                   | 9  |
| Additional References .....                                                                                                            | 13 |

## METHODS

### Participants

We recruited 154 consecutive patients (and both parents) with developmental and epileptic encephalopathy (DEE) and an apparently *de novo* pathogenic variant in a known gene for DEE identified by research or clinical testing<sup>1-3</sup> (unpublished data) between 2003-2016, with the majority of cases identified between July 2012-August 2016. Of the 154 consecutively ascertained trios, 123 (79.9%) passed a minimum of 200 discrete captures (i.e. molecules; see below) and were included in the final analysis. Each family had at least one individual with a carefully phenotyped DEE due to an apparent *de novo* pathogenic variant in one of 33 DEE genes. Across the 33 genes, there were 121 pathogenic variants: 70 missense, 17 nonsense, 9 predicted to alter splicing, 6 small insertions and 19 small deletions (Table S4 in the Supplementary Appendix).

Genomic DNA was isolated from blood and/or saliva using standard methods; Oragene (DNA Genotek) kits were used for saliva DNA extraction. Affected siblings and parents underwent phenotyping of their epilepsy, developmental and medical history, including a validated seizure questionnaire<sup>4</sup>. All individuals, or parents or legal guardians of minors or those with intellectual disability, gave informed consent for study participation. The study was approved by the Human Research Ethics Committees of Austin Health, New Zealand Health and the Institutional Review Board at the University of Washington.

### Mutation detection using targeted sequencing

Single molecule molecular inversion probes (smMIPs) were used to capture the genomic regions of interest as previously described<sup>5-7</sup> with minor modifications. The molecular tag designed within each probe identifies distinct molecules from the same individual, enabling the accurate detection and quantification of low-frequency genomic variation (i.e. mosaicism). We modified this method by using a 5-nucleotide tag, allowing us to detect mosaicism down to at least a 1% level with a minimal false discovery rate.

Library preparation followed published protocols<sup>5</sup> except the ratio of probe to genomic DNA was adjusted to 20,000:1. smMIPs were pooled and sequencing was performed on an Illumina HiSeq 2500 to generate 100 base pair paired-end reads. Prior to alignment, the five-nucleotide molecular tag was clipped; forward and reverse reads were merged using PEAR<sup>8</sup>. Merged reads were aligned to the GRCh37/hg19 reference genome using Burrow-Wheeler Alignment and analyzed using a custom pipeline available on GitHub (<https://github.com/shendurelab/MIPGEN>). Samtools (v1.12) mpileup was used to calculate the number of molecules assayed. Minimum mapping quality 3 (-q 3) was required for an alignment to be considered and a minimum base quality score was not a requirement for inclusion (-Q 0).

A minimum of 200 discrete captures (i.e. molecules assayed) was required for a parent to be included in the study. A parent was considered mosaic if the percentage of single molecule consensus reads exceeded 1%; each mosaic variant was confirmed in an independent capture. The variant-specific sequencing error rate was calculated for each pathogenic variant using sequencing data from all individuals unrelated to the proband (mean error rate: 0.04%). At the minimal coverage for inclusion, the assay had an 86.6% power to detect a 1% mosaic parent (*binomial test*). The median variant coverage was 826 discrete captures, allowing a 99.7% power to detect a 1% mosaic with a false discovery rate of 0.0018% (*binomial test, Bonferroni correction*).

### **Confirming familial relationships**

We used 51 smMIPs, designed as a single nucleotide polymorphism (SNP) marker set for human identification, to test for correct relationships within our sequencing runs<sup>9</sup>. In cases where DNA was limited or there was low coverage in the genomic regions captured by the SNP smMIPs, microsatellite analysis using the PowerPlex S5 System (Promega) was used to confirm maternity and paternity. Parentity was confirmed for all cases.

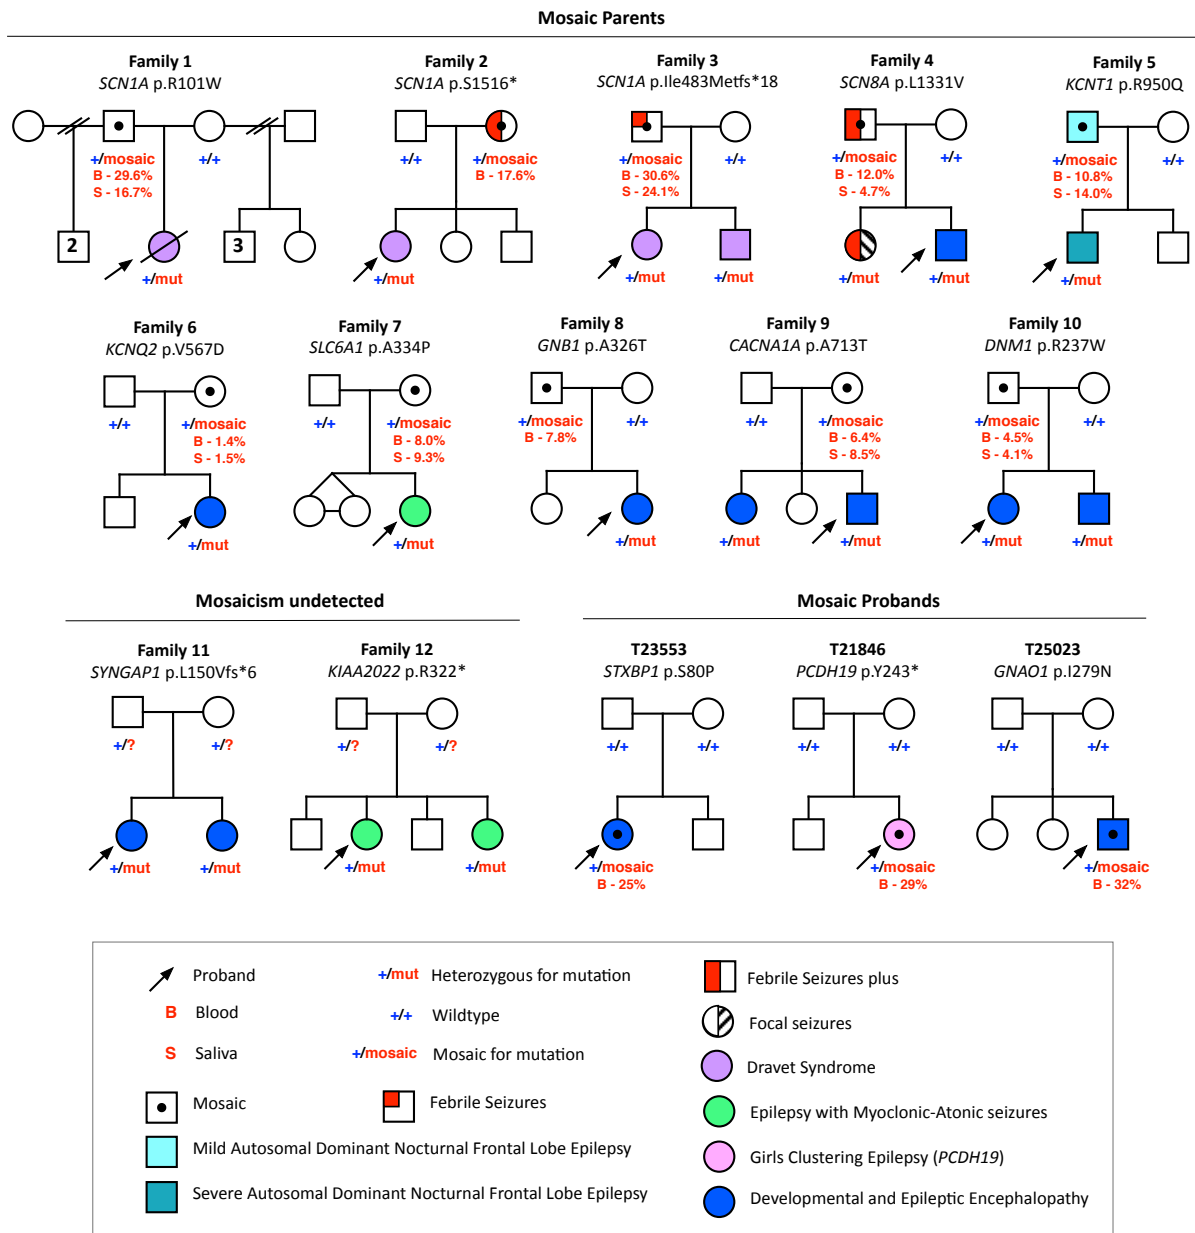

**Figure S1. Pedigrees of families with confirmed (Family 1-10) or inferred (Family 11, 12) parental mosaicism or a mosaic proband.**

| Proband | Gene          | Proband Phenotype | Transcript     | cDNA Change | Protein Change | pAB  | pCvg | pRef | pAlt | allCvg | allRef | Affected Sib? | Affected parent? |
|---------|---------------|-------------------|----------------|-------------|----------------|------|------|------|------|--------|--------|---------------|------------------|
| T23553  | <i>STXBP1</i> | DEE               | NM_003165.3    | c.238T>C    | p.S80P         | 0.25 | 72   | 54   | 18   | 119784 | 119332 | No            | No               |
| T25023  | <i>GNAO1</i>  | DEE               | NM_020988.2    | c.836T>A    | p.I279N        | 0.32 | 1175 | 799  | 373  | 53231  | 53131  | No            | No               |
| T21846  | <i>PCDH19</i> | DEE               | NM_001184880.1 | c.729C>A    | p.Y243*        | 0.29 | 163  | 116  | 47   | 23921  | 23881  | No            | No               |

**Table S1. Mosaic probands.**

Legend: **DEE** – Developmental and Epileptic Encephalopathy, **pAB** - allele balance of the proband, **pCvg** - total coverage (unique captures) in the proband, **pRef** - the number of captures that support the reference allele in the proband, **pAlt** - the number of captures that support the alternate allele in the proband, **allCvg** - total captures using sequencing data from all individuals unrelated to the proband, used as the denominator to determine the variant-specific sequencing error rate, **allRef** - the number of captures that supported the reference call using sequencing data from all individuals unrelated to the proband

| Proband       | Mother | Father | Gene            | Parental mosaicism?                | Proband phenotype | Sibling phenotype                                                                         | Sibling tested for pathogenic variant? | Concordant/Discordant? Phenotype | Affected parent? |
|---------------|--------|--------|-----------------|------------------------------------|-------------------|-------------------------------------------------------------------------------------------|----------------------------------------|----------------------------------|------------------|
| <b>T25786</b> | T25840 | T25841 | <i>SCN1A</i>    | Paternal mosaicism. Family 3.      | Dravet            | Brother - Dravet                                                                          | <i>SCN1A +ve</i>                       | <b>CONCORDANT</b>                | Father - FS      |
| <b>T25417</b> | T23749 | T23736 | <i>SYNGAP1</i>  | Mosaicism not detected. Family 11. | DEE               | Sister - DEE                                                                              | <i>SYNGAP1 +ve</i>                     | <b>CONCORDANT</b>                | No               |
| <b>T24107</b> | T24108 | T24109 | <i>DNM1</i>     | Paternal mosaicism. Family 10.     | DEE               | Brother - DEE                                                                             | <i>DNM1 +ve</i>                        | <b>CONCORDANT</b>                | No               |
| <b>T24139</b> | T24628 | T24627 | <i>CACNA1A</i>  | Maternal mosaicism. Family 9.      | DEE               | Sister - DEE                                                                              | <i>CACNA1A +ve</i>                     | <b>CONCORDANT</b>                | No               |
| <b>T990</b>   | T23797 | T23796 | <i>KIAA2022</i> | Mosaicism not detected. Family 12. | MAE               | Sister - MAE                                                                              | <i>KIAA2022 +ve</i>                    | <b>CONCORDANT</b>                | No               |
| <b>T3929</b>  | T3931  | T3930  | <i>SCN8A</i>    | Paternal mosaicism. Family 4.      | DEE               | Sister - FS+, focal seizures, learning difficulties                                       | <i>SCN8A +ve</i>                       | <b>DISCORDANT</b>                | Father - FS+     |
| <b>T21224</b> | T25630 | T25629 | <i>KCNB1</i>    | No                                 | DEE               | Brother - autistic features, no seizures, borderline intellect, frequent occipital spikes | <i>KCNB1 p.v. negative</i>             | <b>DISCORDANT</b>                | No               |
| <b>T38</b>    | 8595   | T37    | <i>CHD2</i>     | No                                 | MAE               | Sister - unconfirmed seizures                                                             | <i>CHD2 p.v. negative</i>              | <b>DISCORDANT</b>                | Mother - FS      |
| <b>T16910</b> | T16912 | T16909 | <i>SCN1A</i>    | No                                 | Dravet            | Sister - single FS                                                                        | <i>SCN1A p.v. negative</i>             | <b>DISCORDANT</b>                | No               |

|               |        |        |               |    |        |                                  |                            |                   |             |
|---------------|--------|--------|---------------|----|--------|----------------------------------|----------------------------|-------------------|-------------|
| <b>T888</b>   | T886   | T887   | <i>SCN1A</i>  | No | Dravet | Sister - 2 x FS                  | <i>SCN1A p.v. negative</i> | <b>DISCORDANT</b> | No          |
| <b>T25001</b> | T25273 | T25274 | <i>WDR45</i>  | No | DEE    | Maternal half sister - single FS | Not tested (no DNA)        | <b>DISCORDANT</b> | No          |
| <b>T18436</b> | T18437 | T20202 | <i>KCNH5</i>  | No | DEE    | Paternal half sister - FS        | Not tested (no DNA)        | <b>DISCORDANT</b> | Father - FS |
| <b>T22888</b> | T22889 | T22890 | <i>ARID1B</i> | No | DEE    | Sister - single FS               | Not tested (no DNA)        | <b>DISCORDANT</b> | Mother - FS |

**Table S2. Families with more than one affected child.**

Legend: **DEE** – Developmental and Epileptic Encephalopathy, **FS** – Febrile Seizure, **FS+** - Febrile Seizures Plus, **MAE** – Epilepsy with Myoclonic-Atonic Seizures, **p.v.** – pathogenic variant.



| Proband       | Mother | Father | Gene          | Mosaicism detected?           | Proband Phenotype   | Affected parent?                              | Affected Sibling?                                              |
|---------------|--------|--------|---------------|-------------------------------|---------------------|-----------------------------------------------|----------------------------------------------------------------|
| <b>T3091</b>  | T3092  | T3093  | <i>SCN1A</i>  | Maternal mosaicism. Family 2. | Dravet              | Mother - FS                                   | No                                                             |
| <b>9092</b>   | T23573 | 9093   | <i>KCNT1</i>  | Paternal mosaicism. Family 5. | DEE (severe ADNFLE) | Father - Mild ADNFLE                          | No                                                             |
| <b>T3929</b>  | T3931  | T3930  | <i>SCN8A</i>  | Paternal mosaicism. Family 4. | DEE                 | Father - FS+                                  | Sister - FS+, focal seizures, learning difficulties, SCN8A +ve |
| <b>T25786</b> | T25840 | T25841 | <i>SCN1A</i>  | Paternal mosaicism. Family 3. | Dravet              | Father - FS                                   | Brother - Dravet syndrome, SCN1A +ve                           |
| <b>T21156</b> | T21502 | T21501 | <i>SLC2A1</i> | No                            | DEE                 | Mother - FS                                   | No                                                             |
| <b>T20340</b> | T23374 | T20341 | <i>SCN2A</i>  | No                            | DEE                 | Father - FS                                   | No                                                             |
| <b>T24322</b> | T24641 | T24640 | <i>SCN2A</i>  | No                            | DEE                 | Father - FS                                   | No                                                             |
| <b>31232</b>  | 31234  | 31233  | <i>SCN1A</i>  | No                            | Dravet              | Mother - FS                                   | No                                                             |
| <b>T3611</b>  | T3845  | T3846  | <i>SCN1A</i>  | No                            | Dravet              | Mother - unclassified childhood seizures      | No                                                             |
| <b>T882</b>   | T1169  | T1168  | <i>SCN1A</i>  | No                            | Dravet              | Father - FS                                   | No                                                             |
| <b>T21091</b> | T21094 | T21095 | <i>SCN1A</i>  | No                            | Dravet              | Mother - 3 tonic-clonic seizures in adulthood | No                                                             |
| <b>T23532</b> | T23534 | T23533 | <i>GABRA1</i> | No                            | Dravet              | Mother - FS                                   | No                                                             |
| <b>T25956</b> | T25958 | T25957 | <i>CDKL5</i>  | No                            | DEE                 | Mother - FLE                                  | No                                                             |
| <b>T18436</b> | T18437 | T20202 | <i>KCNH5</i>  | No                            | DEE                 | Father – FS                                   | Paternal half sister - FS                                      |
| <b>T22888</b> | T22889 | T22890 | <i>ARID1B</i> | No                            | DEE                 | Mother - FS                                   | Sister - FS                                                    |
| <b>T38</b>    | 8595   | T37    | <i>CHD2</i>   | No                            | MAE                 | Mother – FS                                   | Sister - unconfirmed seizures                                  |

**Table S3. Parents with a history of seizures.**

Legend: **ADNFLE** – Autosomal Dominant Nocturnal Frontal Lobe Epilepsy, **DEE** – Developmental and Epileptic Encephalopathy, **FLE** – Frontal Lobe Epilepsy, **FS** – Febrile Seizure, **FS+** - Febrile Seizures Plus, **MAE** – Epilepsy with Myoclonic-Atonic Seizures.

| Proband<br>(Mosaic Family) | Proband<br>phenotype | Genomic coordinates   | Gene          | GVS<br>function | Proband<br>AB | Mother<br>Alt | Mother<br>Cov | Father<br>Alt | Father<br>Cov | Error<br>Rate |
|----------------------------|----------------------|-----------------------|---------------|-----------------|---------------|---------------|---------------|---------------|---------------|---------------|
| T25031 (#8)                | DEE                  | chr1:1718817C>T       | <i>GNB1</i>   | missense        | 0.561         | 0             | 57            | 8             | 102           | 2E-04         |
| T21006                     | WS                   | chr1:1735987T>C       | <i>GNB1</i>   | missense        | 0.579         | 0             | 409           | 1             | 1635          | 2E-04         |
| T20555                     | IDEE                 | chr1:43393320A>G      | <i>SLC2A1</i> | missense        | 0.484         | 0             | 615           | 0             | 519           | 4E-04         |
| T18702                     | IDEE                 | chr1:43394680G>A      | <i>SLC2A1</i> | missense        | 0.518         | 0             | 401           | 0             | 330           | 2E-04         |
| T22667                     | DEE                  | chr1:43394876C>G      | <i>SLC2A1</i> | splice-site     | 0.485         | 0             | 326           | 0             | 430           | 4E-04         |
| e4693-1                    | EODEE                | chr1:43395390C>G      | <i>SLC2A1</i> | missense        | 0.468         | 0             | 405           | 0             | 520           | 1E-04         |
| T21156                     | DEE                  | chr1:43396337A>C      | <i>SLC2A1</i> | missense        | 0.444         | 0             | 204           | 0             | 230           | 8E-05         |
| T21904                     | DEE                  | chr1:43396356G>A      | <i>SLC2A1</i> | missense        | 0.460         | 1             | 245           | 0             | 211           | 4E-04         |
| e4675-1                    | IDEE                 | chr1:43396798C>T      | <i>SLC2A1</i> | stop-gain       | 0.455         | 2             | 491           | 0             | 818           | 1E-04         |
| T26155                     | IDEE                 | chr1:111146515C>T     | <i>KCNA2</i>  | missense        | 0.512         | 2             | 493           | 1             | 316           | 4E-04         |
| T1898                      | IDEE                 | chr2:149225978AT>A    | <i>MBD5</i>   | frameshift      | 0.483         | 0             | 381           | 0             | 389           | 1E-04         |
| 31144                      | EODEE                | chr2:166170455T>C     | <i>SCN2A</i>  | missense        | 0.556         | 0             | 1229          | 0             | 1320          | 3E-04         |
| e4699-1                    | IDEE                 | chr2:166201174T>C     | <i>SCN2A</i>  | missense        | 0.464         | 1             | 1030          | 4             | 1011          | 1E-03         |
| 31145                      | IDEE                 | chr2:166201201T>C     | <i>SCN2A</i>  | missense        | 0.519         | 0             | 260           | 0             | 319           | 3E-04         |
| T22816                     | EIMFS                | chr2:166201285T>G     | <i>SCN2A</i>  | missense        | 0.404         | 0             | 879           | 0             | 2862          | 9E-05         |
| T23161                     | DEE                  | chr2:166210710C>A     | <i>SCN2A</i>  | missense        | 0.466         | 1             | 3691          | 1             | 2614          | 3E-04         |
| T20340                     | DEE                  | chr2:166210838GA>G    | <i>SCN2A</i>  | frameshift      | 0.529         | 0             | 950           | 0             | 1251          | 2E-04         |
| T24322                     | EODEE                | chr2:166243481G>A     | <i>SCN2A</i>  | missense        | 0.544         | 0             | 1026          | 2             | 2141          | 2E-04         |
| T24262                     | OS                   | chr2:166245217G>T     | <i>SCN2A</i>  | missense        | 0.473         | 2             | 1075          | 0             | 565           | 4E-04         |
| T24127                     | EODEE                | chr2:166245961G>A     | <i>SCN2A</i>  | missense        | 0.499         | 0             | 1039          | 0             | 576           | 3E-04         |
| 31232                      | Dravet               | chr2:166848111G>A     | <i>SCN1A</i>  | stop-gain       | 0.515         | 0             | 919           | 0             | 550           | 1E-04         |
| T3611                      | Dravet               | chr2:166848129G>A     | <i>SCN1A</i>  | stop-gain       | 0.449         | 0             | 1484          | 0             | 1418          | 1E-04         |
| T24455                     | Dravet               | chr2:166848540C>T     | <i>SCN1A</i>  | missense        | 0.444         | 2             | 742           | 1             | 945           | 8E-04         |
| T23445                     | Dravet               | chr2:166850699TC>T    | <i>SCN1A</i>  | frameshift      | 0.522         | 0             | 2016          | 0             | 2743          | 3E-05         |
| 7962                       | Dravet               | chr2:166850722G>A     | <i>SCN1A</i>  | missense        | 0.479         | 3             | 2607          | 0             | 1223          | 4E-04         |
| T3091 (#2)                 | Dravet               | chr2:166852557G>T     | <i>SCN1A</i>  | stop-gain       | 0.525         | 258           | 1468          | 0             | 1225          | 5E-04         |
| T896                       | Dravet               | chr2:166852557G>T     | <i>SCN1A</i>  | stop-gain       | 0.517         | 0             | 638           | 0             | 387           | 5E-04         |
| T32753                     | Dravet               | chr2:166854570TTATC>T | <i>SCN1A</i>  | frameshift      | 0.575         | 0             | 457           | 0             | 600           | 0E+00         |
| T19963                     | Dravet               | chr2:166854571T>C     | <i>SCN1A</i>  | missense        | 0.460         | 0             | 3401          | 0             | 357           | 2E-04         |
| T25786 (#3)                | Dravet               | chr2:166854574CT>C    | <i>SCN1A</i>  | frameshift      | 0.520         | 0             | 277           | 122           | 399           | 0E+00         |
| T20264                     | Dravet               | chr2:166854636A>G     | <i>SCN1A</i>  | missense        | 0.464         | 0             | 1019          | 0             | 1013          | 1E-04         |
| T18466                     | Dravet               | chr2:166859233G>A     | <i>SCN1A</i>  | missense        | 0.611         | 2             | 3753          | 1             | 3190          | 6E-04         |
| T19875                     | DEE EAS              | chr2:166866254G>A     | <i>SCN1A</i>  | missense        | 0.516         | 0             | 1409          | 0             | 1778          | 3E-04         |
| T882                       | Dravet               | chr2:166866255C>G     | <i>SCN1A</i>  | missense        | 0.443         | 0             | 1362          | 0             | 4991          | 4E-05         |
| T16910                     | Dravet               | chr2:166866262AG>G    | <i>SCN1A</i>  | frameshift      | 0.564         | 0             | 1483          | 0             | 1269          | 7E-06         |
| T19196                     | Dravet               | chr2:166866291AT>A    | <i>SCN1A</i>  | frameshift      | 0.502         | 0             | 1409          | 0             | 987           | 5E-05         |
| T1144                      | Dravet               | chr2:166892965C>A     | <i>SCN1A</i>  | stop-gain       | 0.494         | 0             | 204           | 0             | 259           | 4E-05         |
| T21674                     | Dravet               | chr2:166894396G>A     | <i>SCN1A</i>  | missense        | 0.539         | 0             | 418           | 0             | 266           | 4E-04         |

|              |          |                                   |                |             |       |     |      |   |      |       |
|--------------|----------|-----------------------------------|----------------|-------------|-------|-----|------|---|------|-------|
| T2590        | Dravet   | chr2:166894401A>T                 | <i>SCN1A</i>   | missense    | 0.466 | 0   | 444  | 0 | 414  | 1E-04 |
| T19500       | Dravet   | chr2:166896094TC>T                | <i>SCN1A</i>   | frameshift  | 0.484 | 1   | 1721 | 0 | 1437 | 8E-05 |
| T1832        | Dravet   | chr2:166897741C>T                 | <i>SCN1A</i>   | splice-site | 0.498 | 1   | 269  | 1 | 254  | 6E-04 |
| T888         | Dravet   | chr2:166898935C>T                 | <i>SCN1A</i>   | splice-site | 0.523 | 0   | 292  | 0 | 292  | 3E-04 |
| T18832       | Dravet   | chr2:166900484G>A                 | <i>SCN1A</i>   | splice-site | 0.482 | 0   | 1794 | 0 | 1482 | 2E-04 |
| T1498        | Dravet   | chr2:166900497GA>G                | <i>SCN1A</i>   | frameshift  | 0.409 | 0   | 1555 | 0 | 995  | 1E-04 |
| T1602        | Dravet   | chr2:166903392A>T                 | <i>SCN1A</i>   | missense    | 0.462 | 0   | 1218 | 0 | 1354 | 3E-04 |
| T2942        | Dravet   | chr2:166903460G>T                 | <i>SCN1A</i>   | stop-gain   | 0.512 | 0   | 3003 | 0 | 2424 | 6E-04 |
| T19076       | DEE mild | chr2:166903476G>T                 | <i>SCN1A</i>   | missense    | 0.473 | 0   | 2659 | 0 | 2698 | 4E-04 |
| T22005       | Dravet   | chr2:166903479C>T                 | <i>SCN1A</i>   | missense    | 0.486 | 1   | 1375 | 0 | 634  | 1E-04 |
| T23245       | Dravet   | chr2:166903479C>G                 | <i>SCN1A</i>   | missense    | 0.503 | 0   | 866  | 0 | 1675 | 7E-05 |
| T26106       | Dravet   | chr2:166904244C>G                 | <i>SCN1A</i>   | missense    | 0.455 | 0   | 900  | 0 | 532  | 8E-05 |
| 31792        | Dravet   | chr2:166908262C>A                 | <i>SCN1A</i>   | stop-gain   | 0.485 | 0   | 301  | 0 | 247  | 6E-05 |
| T21091       | Dravet   | chr2:166908266GAC>G               | <i>SCN1A</i>   | frameshift  | 0.516 | 0   | 940  | 0 | 1085 | 0E+00 |
| T25634       | EISE     | chr2:166909379G>A                 | <i>SCN1A</i>   | missense    | 0.492 | 1   | 1004 | 0 | 2323 | 5E-04 |
| T32999       | Dravet   | chr2:166911245A>G                 | <i>SCN1A</i>   | missense    | 0.495 | 0   | 656  | 0 | 871  | 2E-04 |
| T1635        | Dravet   | chr2:166911254T>TGATTAC           | <i>SCN1A</i>   | frameshift  | 0.539 | 0   | 614  | 0 | 421  | 0E+00 |
| T25354       | Dravet   | chr2:166913012T>C                 | <i>SCN1A</i>   | splice-site | 0.479 | 3   | 1954 | 0 | 941  | 9E-04 |
| T17775       | Dravet   | chr2:166915080G>T                 | <i>SCN1A</i>   | stop-gain   | 0.415 | 0   | 334  | 0 | 332  | 3E-04 |
| T20166       | Dravet   | chr2:166915161C>T                 | <i>SCN1A</i>   | missense    | 0.551 | 1   | 573  | 0 | 614  | 7E-04 |
| T25407 (#1)  | Dravet   | chr2:166915162G>A                 | <i>SCN1A</i>   | missense    | 0.477 | 0   | 259  | 5 | 30   | 2E-04 |
| 8707         | Dravet   | chr2:166930020GG>G                | <i>SCN1A</i>   | frameshift  | 0.520 | 0   | 2464 | 0 | 1160 | 0E+00 |
| T23870       | IDEE     | chr2:197081742C>T                 | <i>HECW2</i>   | missense    | 0.480 | 0   | 2289 | 0 | 689  | 4E-04 |
| e4914-1      | MAE      | chr3:11067229T>C                  | <i>SLC6A1</i>  | missense    | 0.484 | 0   | 279  | 0 | 364  | 6E-04 |
| e4919-1      | MAE      | chr3:11067457A>G                  | <i>SLC6A1</i>  | splice-site | 0.421 | 0   | 968  | 0 | 474  | 1E-04 |
| T21866 (#7)  | MAE      | chr3:11067967G>C                  | <i>SLC6A1</i>  | missense    | 0.506 | 246 | 3056 | 0 | 2694 | 5E-04 |
| T23549       | DEE      | chr5:88100558A>G                  | <i>MEF2C</i>   | missense    | 0.433 | 0   | 1215 | 0 | 516  | 4E-04 |
| T21213       | DEE      | chr5:160758056G>A                 | <i>GABRB2</i>  | missense    | 0.469 | 0   | 1256 | 0 | 1391 | 3E-04 |
| T23211       | EODEE    | chr5:160761861A>G                 | <i>GABRB2</i>  | missense    | 0.503 | 0   | 1281 | 0 | 352  | 6E-04 |
| T23532       | Dravet   | chr5:161300202G>A                 | <i>GABRA1</i>  | missense    | 0.484 | 3   | 2379 | 0 | 2397 | 1E-03 |
| e4738-1      | DEE mild | chr5:161569293A>C                 | <i>GABRG2</i>  | missense    | 0.647 | 0   | 284  | 0 | 342  | 1E-04 |
| T20719       | MAE      | chr5:161576159G>A                 | <i>GABRG2</i>  | missense    | 0.430 | 0   | 305  | 1 | 466  | 1E-03 |
| T25417 (#11) | DEE      | chr6:33400506G<br>>GAAGTCACAACCCA | <i>SYNGAP1</i> | frameshift  | 0.462 | 0   | 834  | 0 | 1351 | 0E+00 |
| T15923       | DEE      | chr6:33405482G>A                  | <i>SYNGAP1</i> | stop-gain   | 0.511 | 0   | 1046 | 0 | 836  | 5E-04 |
| T22888       | DEE      | chr6:157528565AC>A                | <i>ARID1B</i>  | frameshift  | 0.482 | 0   | 217  | 0 | 506  | 4E-05 |
| e4682-1      | EODEE    | chr9:130416000G>GT                | <i>STXBP1</i>  | frameshift  | 0.502 | 0   | 835  | 0 | 2862 | 5E-06 |
| T20627       | DEE      | chr9:130422380CACTG>C             | <i>STXBP1</i>  | frameshift  | 0.502 | 0   | 395  | 0 | 980  | 2E-05 |
| T23930       | EODEE    | chr9:130423407CT>C                | <i>STXBP1</i>  | frameshift  | 0.511 | 0   | 697  | 0 | 336  | 9E-06 |
| T23122       | EODEE    | chr9:130425622C>T                 | <i>STXBP1</i>  | missense    | 0.499 | 2   | 2380 | 1 | 2652 | 6E-04 |
| T1915        | Dravet   | chr9:130430411G>A                 | <i>STXBP1</i>  | missense    | 0.400 | 0   | 323  | 0 | 934  | 6E-04 |

|              |              |                       |                 |             |       |    |      |     |      |       |
|--------------|--------------|-----------------------|-----------------|-------------|-------|----|------|-----|------|-------|
| T22856       | EODEE        | chr9:130435490T>C     | <i>STXBP1</i>   | missense    | 0.473 | 2  | 1003 | 0   | 935  | 6E-04 |
| T23289       | IDEA         | chr9:130446652A>G     | <i>STXBP1</i>   | missense    | 0.453 | 0  | 725  | 0   | 1183 | 3E-04 |
| T24107 (#10) | DEE          | chr9:130982480C>T     | <i>DNM1</i>     | missense    | 0.709 | 0  | 2611 | 118 | 2623 | 2E-04 |
| 9092 (#5)    | DEE (ADNFLE) | chr9:138675877G>A     | <i>KCNT1</i>    | missense    | 0.501 | 0  | 25   | 21  | 195  | 1E-03 |
| T23159       | EME          | chr11:35336626A>G     | <i>SLC1A2</i>   | missense    | 0.477 | 2  | 292  | 1   | 332  | 5E-04 |
| T3129        | DEE CSWS     | chr12:13828685C>T     | <i>GRIN2B</i>   | stop-gain   | 0.478 | 5  | 1671 | 2   | 2260 | 2E-03 |
| T3929 (#4)   | DEE          | chr12:52180374C>G     | <i>SCN8A</i>    | missense    | 0.553 | 0  | 401  | 119 | 994  | 0E+00 |
| T23111       | EODEE        | chr12:52200884C>T     | <i>SCN8A</i>    | missense    | 0.528 | 2  | 1345 | 0   | 1655 | 4E-04 |
| T18436       | DEE EAS      | chr14:63417240C>T     | <i>KCNH5</i>    | missense    | 0.462 | 0  | 1014 | 0   | 835  | 1E-03 |
| T23296       | MAE          | chr14:102514979C>A    | <i>DYNC1H1</i>  | missense    | 0.422 | 0  | 894  | 0   | 396  | 9E-05 |
| T25708       | LGS          | chr15:26806246C>T     | <i>GABRB3</i>   | missense    | 0.504 | 0  | 1123 | 0   | 494  | 3E-04 |
| T25111       | DEE          | chr15:26812818G>T     | <i>GABRB3</i>   | missense    | 0.450 | 0  | 495  | 0   | 477  | 2E-03 |
| T22598       | IDEA         | chr15:26825603T>A     | <i>GABRB3</i>   | missense    | 0.519 | 7  | 2366 | 6   | 2401 | 3E-03 |
| T18697       | DEE          | chr15:93470540C>T     | <i>CHD2</i>     | stop-gain   | 0.406 | 1  | 792  | 0   | 881  | 9E-04 |
| T2608        | LGS          | chr15:93492254C>CT    | <i>CHD2</i>     | frameshift  | 0.447 | 0  | 1757 | 0   | 1697 | 0E+00 |
| T22432       | DEE          | chr15:93492257C>T     | <i>CHD2</i>     | stop-gain   | 0.394 | 2  | 1496 | 1   | 1812 | 5E-04 |
| T17756       | DEE          | chr15:93496726T>C     | <i>CHD2</i>     | missense    | 0.464 | 4  | 1896 | 1   | 2140 | 8E-04 |
| T18431       | DEE          | chr15:93515610T>C     | <i>CHD2</i>     | missense    | 0.456 | 0  | 268  | 2   | 1358 | 7E-04 |
| T38          | MAE          | chr15:93545499CAAAG>C | <i>CHD2</i>     | frameshift  | 0.413 | 0  | 4281 | 0   | 4487 | 3E-03 |
| T24220       | DEE          | chr15:93557952T>TG    | <i>CHD2</i>     | frameshift  | 0.447 | 0  | 1238 | 0   | 1542 | 1E-05 |
| T20240       | MAE          | chr15:93563264AAG>A   | <i>CHD2</i>     | frameshift  | 0.500 | 0  | 910  | 0   | 911  | 0E+00 |
| T25816       | EODEE        | chr16:56370729C>T     | <i>GNAO1</i>    | missense    | 0.523 | 0  | 352  | 0   | 329  | 1E-03 |
| T23039       | EODEE        | chr19:13414398C>T     | <i>CACNA1A</i>  | missense    | 0.430 | 0  | 903  | 0   | 233  | 2E-04 |
| T24139 (#9)  | EODEE        | chr19:13414398C>T     | <i>CACNA1A</i>  | missense    | 0.470 | 31 | 481  | 0   | 318  | 2E-04 |
| T21224       | IDEA         | chr20:47990896C>T     | <i>KCNB1</i>    | missense    | 0.479 | 0  | 995  | 0   | 951  | 1E-04 |
| T26654       | IDEA         | chr20:47990953C>T     | <i>KCNB1</i>    | missense    | 0.522 | 1  | 2490 | 0   | 3021 | 1E-04 |
| T25029       | OS -> LGS    | chr20:62044824C>T     | <i>KCNQ2</i>    | missense    | 0.429 | 2  | 450  | 0   | 502  | 2E-03 |
| T23926 (#6)  | OS           | chr20:62044866A>T     | <i>KCNQ2</i>    | missense    | 0.519 | 4  | 284  | 0   | 267  | 2E-03 |
| T21758       | OS           | chr20:62070028T>C     | <i>KCNQ2</i>    | missense    | 0.472 | 0  | 816  | 0   | 413  | 5E-04 |
| T26147       | WS + FCD     | chr22:32234705CA>C    | <i>DEPDC5</i>   | frameshift  | 0.482 | 0  | 242  | 0   | 224  | 9E-05 |
| T25956       | IDEA         | chrX:18598088G>C      | <i>CDKL5</i>    | missense    | 0.492 | 0  | 748  | 0   | 548  | 2E-04 |
| T20819       | EODEE        | chrX:18602381A>G      | <i>CDKL5</i>    | splice-site | 0.994 | 1  | 1235 | 2   | 2151 | 8E-04 |
| e4702-1      | EODEE        | chrX:18602432C>G      | <i>CDKL5</i>    | stop-gain   | 0.517 | 0  | 597  | 0   | 1057 | 6E-05 |
| T22954       | EODEE        | chrX:18602464T>C      | <i>CDKL5</i>    | missense    | 0.502 | 1  | 1639 | 0   | 996  | 5E-04 |
| T24729       | LGS          | chrX:48932539CAT>C    | <i>WDR45</i>    | frameshift  | 0.524 | 0  | 573  | 0   | 211  | 0E+00 |
| T25001       | DEE          | chrX:48933232G>A      | <i>WDR45</i>    | stop-gain   | 0.489 | 0  | 639  | 0   | 295  | 7E-05 |
| T20993       | WS -> LGS    | chrX:48933304AG>A     | <i>WDR45</i>    | frameshift  | 0.525 | 0  | 381  | 0   | 1979 | 1E-05 |
| e4695-1      | DEE          | chrX:48933318C>T      | <i>WDR45</i>    | missense    | 0.512 | 0  | 1558 | 0   | 432  | 1E-04 |
| T22244       | DEE          | chrX:73962417G>A      | <i>KIAA2022</i> | stop-gain   | 0.643 | 1  | 459  | 1   | 310  | 1E-03 |
| T990 (#12)   | MAE          | chrX:73963428G>A      | <i>KIAA2022</i> | stop-gain   | 0.497 | 1  | 570  | 1   | 201  | 1E-03 |
| T1828        | GCE          | chrX:99662770A>G      | <i>PCDH19</i>   | missense    | 0.483 | 0  | 302  | 0   | 239  | 6E-04 |

|        |     |                   |               |            |       |   |     |   |     |       |
|--------|-----|-------------------|---------------|------------|-------|---|-----|---|-----|-------|
| T22482 | GCE | chrX:99663098G>GT | <i>PCDH19</i> | frameshift | 0.521 | 0 | 303 | 0 | 322 | 0E+00 |
|--------|-----|-------------------|---------------|------------|-------|---|-----|---|-----|-------|

---

**Table S4. Sequencing data, clinical and molecular details for all 120 families\*.**

Legend: **AB** – allele balance, **ADNFLE** – Autosomal Dominant Nocturnal Frontal Lobe Epilepsy, **AHC** – Alternating Hemiplegia of Childhood, **Alt** – the number of captures that support the alternate allele, **Cov** – total coverage (unique captures by single molecule tagging), **CSWS** – Continuous Spike and Wave during Slow-wave Sleep, **DEE** – Developmental and Epileptic Encephalopathy (not otherwise specified), **EAS** – Epilepsy-aphasia syndrome, **EIMFS** – Epilepsy of Infancy with Migrating Focal Seizures, **EISE** – Early Infantile SCN1A Encephalopathy, **EOAE** – Early Onset Absence Epilepsy, **EODEE** – Early Onset Developmental and Epileptic Encephalopathy, **FCD** – Focal Cortical Dysplasia, **FLE** – Frontal Lobe Epilepsy, **GCE** – Girls Clustering Epilepsy (*PCDH19*), **IDEE** – Infantile Developmental and Epileptic Encephalopathy, **LGS** – Lennox Gastaut Syndrome, **MAE** – Epilepsy with Myoclonic-Atonic seizures, **OS** – Ohtahara syndrome, **WS** – West syndrome, -> – evolving to.

\* An expanded version of this table in excel format is available upon request

**ADDITIONAL REFERENCES**

1. Carvill GL, Heavin SB, Yendle SC, et al. Targeted resequencing in epileptic encephalopathies identifies de novo mutations in CHD2 and SYNGAP1. *Nature Genetics*. 2013;45:825-30.
2. Carvill GL, McMahon JM, Schneider A, et al. Mutations in the GABA Transporter SLC6A1 Cause Epilepsy with Myoclonic-Atonic Seizures. *American Journal of Human Genetics*. 2015;96:808-15.
3. Epi4K Consortium. De Novo Mutations in SLC1A2 and CACNA1A Are Important Causes of Epileptic Encephalopathies. *American Journal of Human Genetics*. 2016;99:287-98.
4. Reutens DC, Howell RA, Gebert KE, Berkovic SF. Validation of a questionnaire for clinical seizure diagnosis. *Epilepsia*. 1992;33:1065-71.
5. Hiatt JB, Pritchard CC, Salipante SJ, O'Roak BJ, Shendure J. Single molecule molecular inversion probes for targeted, high-accuracy detection of low-frequency variation. *Genome Research*. 2013;23:843-54.
6. Stessman HA, Xiong B, Coe BP, et al. Targeted sequencing identifies 91 neurodevelopmental-disorder risk genes with autism and developmental-disability biases. *Nature Genetics*. 2017;49:515-26.
7. O'Roak BJ, Vives L, Fu W, et al. Multiplex targeted sequencing identifies recurrently mutated genes in autism spectrum disorders. *Science*. 2012;338:1619-22.
8. Zhang J, Kobert K, Flouri T, Stamatakis A. PEAR: a fast and accurate Illumina Paired-End reAd mergeR. *Bioinformatics*. 2014;30:614-20.
9. Borsting C, Sanchez JJ, Hansen HE, Hansen AJ, Bruun HQ, Morling N. Performance of the SNPforID 52 SNP-plex assay in paternity testing. *Forensic Science International Genetics*. 2008;2:292-300.
